# Supplementary material for: Metarhizium carneum Formulations: A Promising New Biological Control to Be Incorporated in the Integrated Management of Meloidogyne enterolobii on Tomato Plants
Source: MDPI journal article supplement (doi:10.3390/plants12193431), 2023-09-29
Supplement: s1 [file s1]

**Table S1.** Development (mean  $\pm$  standard deviation) at 60 days after transplanting of tomato plants infested with *Meloidogyne enterolobii* and under different nematicide treatments.

| Treatments                                         | Height cm         | Stem diameter cm  | Foliage fresh weight g | Flowers number   | Chlorophyll content index | Root length cm | Root weight g    |
|----------------------------------------------------|-------------------|-------------------|------------------------|------------------|---------------------------|----------------|------------------|
| <i>Metarhizium carneum</i>                         | 92 $\pm$ 3 ab     | 7.0 $\pm$ 0.9 a   | 86.6 $\pm$ 5.7 bc      | 10.3 $\pm$ 3.9 b | 18.7 $\pm$ 2.5 b          | 55.4 $\pm$ 5.5 | 29.2 $\pm$ 1 a   |
| <i>Purpureocillium lilacinum</i>                   | 82.7 $\pm$ 11 b   | 6.5 $\pm$ 0.2 abc | 72.7 $\pm$ 10 c        | 5.7 $\pm$ 3 b    | 17.4 $\pm$ 2 b            | 44.0 $\pm$ 11  | 29.4 $\pm$ 0.4 a |
| Metabolites from <i>M. verrucaria</i> fermentation | 106.7 $\pm$ 6.7 a | 6.7 $\pm$ 0.5 ab  | 114.9 $\pm$ 4.2 a      | 20.7 $\pm$ 4.4 a | 28.9 $\pm$ 6.6 a          | 63.3 $\pm$ 16  | 33.4 $\pm$ 3 a   |
| Metam sodium + <i>Metarhizium carneum</i>          | 79.3 $\pm$ 6.5 b  | 5.2 $\pm$ 0.4d    | 75.5 $\pm$ 5.8 c       | 5.0 $\pm$ 0.8 b  | 21.8 $\pm$ 3.7 b          | 48.7 $\pm$ 6   | 8.5 $\pm$ 0.7 b  |
| Fluensulfone                                       | 97.0 $\pm$ 22 ab  | 5.7 $\pm$ 0.5 cd  | 100.2 $\pm$ 26 ab      | 10.3 $\pm$ 6.1 b | 18.7 $\pm$ 1.1 b          | 56.2 $\pm$ 35  | 11.1 $\pm$ 3.1 b |
| Metam sodium + abamectina                          | 89.7 $\pm$ 2.7 ab | 5.4 $\pm$ 0.5 d   | 82.3 $\pm$ 8.1 bc      | 4.7 $\pm$ 1.3 b  | 18.9 $\pm$ 3.2 b          | 55.3 $\pm$ 13  | 8.9 $\pm$ 2.1 b  |
| Control                                            | 97.3 $\pm$ 17 ab  | 5.8 $\pm$ 0.6 bcd | 82.6 $\pm$ 20 bc       | 9.0 $\pm$ 4.5 b  | 18.4 $\pm$ 4.2 b          | 53.5 $\pm$ 9.9 | 28.3 $\pm$ 8.1 a |
| p                                                  | <0.01             | <0.01             | <0.01                  | <0.01            | <0.01                     | 0.34           | <0.01            |

Different letters in each column denote significant differences between treatments indicated by a Tukey test  $p \leq 0.01$ .

**Table S2.** Development (mean  $\pm$  standard deviation) at 120 days after transplanting of tomato plants infested with *Meloidogyne enterolobii* and under different nematicide treatments.

| Treatments                                         | Height cm           | Stem diameter cm | Foliage fresh weight g | Flowers number    | Chlorophyll content index | Root length cm   | Root weight g      |
|----------------------------------------------------|---------------------|------------------|------------------------|-------------------|---------------------------|------------------|--------------------|
| <i>Metarhizium carneum</i>                         | 161.8 $\pm$ 18.1 bc | 9.3 $\pm$ 0.2 ab | 218.6 $\pm$ 17 c       | 14.7 $\pm$ 1.8 b  | 12.3 $\pm$ 3.5 bc         | 55.1 $\pm$ 19 bc | 169.6 $\pm$ 28 a   |
| <i>Purpureocillium lilacinum</i>                   | 164.7 $\pm$ 35 bc   | 8.5 $\pm$ 1.5 ab | 177.2 $\pm$ 95 c       | 8.7 $\pm$ 3.5 b   | 14.3 $\pm$ 2.5 abc        | 43.8 $\pm$ 19 c  | 105.7 $\pm$ 36 ab  |
| Metabolites from <i>M. verrucaria</i> fermentation | 115.7 $\pm$ 24 d    | 8.4 $\pm$ 1.1 ab | 126.9 $\pm$ 84 c       | 12.3 $\pm$ 7 b    | 10.2 $\pm$ 3.3 c          | 38.7 $\pm$ 14 c  | 71.2 $\pm$ 35 bc   |
| Metam sodium + <i>Metarhizium carneum</i>          | 159.0 $\pm$ 27 cd   | 7.8 $\pm$ 0.1 b  | 500.6 $\pm$ 156 b      | 16.3 $\pm$ 8.6 b  | 16.3 $\pm$ 2.5 ab         | 82.0 $\pm$ 12 a  | 50.6 $\pm$ 15 bc   |
| Fluensulfone                                       | 206.0 $\pm$ 33 ab   | 8.6 $\pm$ 0.5 ab | 788.4 $\pm$ 40 a       | 41.7 $\pm$ 20 a   | 17.7 $\pm$ 2.8 a          | 71.0 $\pm$ 13 b  | 31.0 $\pm$ 5.9 c   |
| Metam sodium + abamectina                          | 208.5 $\pm$ 29 a    | 9.5 $\pm$ 0.8 a  | 808.0 $\pm$ 173 a      | 53.3 $\pm$ 14.5 a | 13.3 $\pm$ 0.8 abc        | 78.4 $\pm$ 13 ab | 107.1 $\pm$ 33 ab  |
| Control                                            | 149.5 $\pm$ 13 cd   | 8.5 $\pm$ 1.3 ab | 130.9 $\pm$ 72 c       | 9.3 $\pm$ 8.7 b   | 11.7 $\pm$ 3.8 bc         | 43.6 $\pm$ 2.7 c | 90.9 $\pm$ 89.1 bc |
| p                                                  | <0.01               | <0.01            | <0.01                  | <0.01             | <0.01                     | <0.01            | <0.01              |

Different letters in each column denote significant differences between treatments indicated by a Tukey test  $p \leq 0.01$ .
